# Supplementary material for: Prevalence and Penetrance of BRCA1 and BRCA2 Germline Mutations in Colombian Breast Cancer Patients
Source: PubMed Central journal article supplement (PMC5498630; doi:10.1038/s41598-017-05056-y), 2017-07-05

## **Prevalence and Penetrance of *BRCA1* and *BRCA2* Germline Mutations in Colombian Breast Cancer Patients**

D. Torres<sup>1,2,§</sup>, J. Lorenzo Bermejo<sup>3,§</sup>, M. U. Rashid<sup>1,4</sup>, I. Briceño<sup>2,5</sup>, F. Gil<sup>6</sup>, A. Beltran<sup>7</sup>, V. Ariza<sup>7</sup>, U. Hamann<sup>1</sup>

<sup>1</sup> Molecular Genetics of Breast Cancer, German Cancer Research Center (DKFZ), Heidelberg, Germany

<sup>2</sup> Institute of Human Genetics, Pontificia Universidad Javeriana, Bogota, Colombia

<sup>3</sup> Institute of Medical Biometry and Informatics, University of Heidelberg, Heidelberg, Germany

<sup>4</sup> Department of Basic Sciences Research, Shaukat Khanum Memorial Cancer Hospital and Research Centre (SKMCH & RC), Lahore, Pakistan

<sup>5</sup> Universidad de la Sabana, Bogota, Colombia

<sup>6</sup> Unit of Clinical Epidemiology and Biostatistics, Pontificia Universidad Javeriana, Bogota, Colombia

<sup>7</sup> Universidad Nacional, Bogota, Colombia

§ These authors contributed equally to this work.

Correspondence: [u.hamann@dkfz-heidelberg.de](mailto:u.hamann@dkfz-heidelberg.de)

## Supplementary Data

**Supplementary Table 1.** Estimated hazard ratios (HRs) of ovarian cancer in relatives of carriers of Colombian *BRCA1/2* founder mutations.

**Supplementary Table 2.** Estimated hazard ratios (HRs) of breast, ovarian and cervical cancer, and in relatives of carriers of Colombian *BRCA1/2* founder mutations.

**Supplementary Figure 1.** Multiplex ligation-dependent probe amplification (MLPA) analysis of the *BRCA2* gene.

**Supplementary Figure 2.** Pedigree deviances.

**Supplementary Table 1. Estimated hazard ratios (HRs) of ovarian cancer in relatives of carriers of Colombian *BRCA1/2* founder mutations stratified by birth year, proband's age at diagnosis, mutated *BRCA1/2* gene and *BRCA1/2* mutation type.**

| Variable                   | Level        | Women | Events | HR    | 95% CI       | Pval | Σrisk45y | 95% CI     |
|----------------------------|--------------|-------|--------|-------|--------------|------|----------|------------|
| Birth year                 | Before 1960  | 65    | 1      | Ref.  |              | 0.34 | 0.02     | 0.00- 0.04 |
|                            | 1960-69      | 59    | 3      | 5.60  | 0.57- 55.35  |      | 0.08     | 0.00- 0.17 |
|                            | 1970-79      | 53    | 0      | -     |              |      |          |            |
|                            | 1980+        | 74    | 0      | -     |              |      |          |            |
| Study type                 | Case-control | 213   | 3      | Ref.  |              | 0.80 | 0.04     | 0.00- 0.08 |
|                            | Family study | 38    | 1      | 1.35  | 0.14- 12.98  |      | 0.05     | 0.00- 0.14 |
| Relationship with proband  | Other        | 97    | 0      | -     |              | 0.87 |          |            |
|                            | Sister       | 86    | 3      | Ref.  |              |      | 0.05     | 0.00- 0.10 |
|                            | Daughter     | 57    | 1      | 2.64  | 0.27- 25.48  |      | 0.12     | 0.00- 0.32 |
|                            | Mother       | 11    | 0      | -     |              |      |          |            |
| Proband's age at diagnosis | Less than 40 | 59    | 0      | -     |              | 0.90 |          |            |
|                            | 40-44        | 57    | 1      | Ref.  |              |      | 0.03     | 0.00- 0.09 |
|                            | 45-49        | 70    | 2      | 2.38  | 0.22- 26.22  |      | 0.08     | 0.00- 0.17 |
|                            | 50+          | 65    | 1      | 1.23  | 0.08- 19.72  |      | 0.04     | 0.00- 0.11 |
| <i>BRCA1/2</i> mutations   | None         | 142   | 1      | Ref.  |              | 0.17 | 0.01     | 0.00- 0.04 |
|                            | <i>BRCA1</i> | 80    | 3      | 8.94  | 0.93- 86.37  |      | 0.12     | 0.00- 0.25 |
|                            | <i>BRCA2</i> | 29    | 0      | -     |              |      |          |            |
| Mutation type              | None         | 142   | 1      | Ref.  |              | 0.29 | 0.01     | 0.00- 0.04 |
|                            | 1991del4     | 7     | 0      | -     |              |      |          |            |
|                            | 3034del4     | 22    | 0      | -     |              |      |          |            |
|                            | 3450del4     | 54    | 3      | 13.12 | 1.36- 126.93 |      | 0.18     | 0.00- 0.34 |
|                            | A1708E       | 26    | 0      | -     |              |      |          |            |

CI, confidence interval; Pval, P-value; Σrisk45y, cumulative risk by age 45 years; Ref., reference.

**Supplementary Table 2. Estimated hazard ratios (HRs) of breast, ovarian and cervical cancer, and in relatives of carriers of Colombian *BRCA1/2* founder mutations stratified by birth year, proband's age at diagnosis, mutated *BRCA1/2* gene and *BRCA1/2* mutation type.**

| Variable                   | Level        | Women | Events | HR   | 95% CI      | Pval   | Σrisk70y | 95% CI     |
|----------------------------|--------------|-------|--------|------|-------------|--------|----------|------------|
| Birth year                 | Before 1960  | 65    | 11     | Ref. |             | 0.05   | 0.29     | 0.05- 0.47 |
|                            | 1960-69      | 59    | 14     | 4.03 | 1.53- 10.60 |        | 0.75     | 0.00- 0.95 |
|                            | 1970-79      | 53    | 1      | 2.62 | 0.27- 25.77 |        | 0.60     | 0.00- 0.95 |
|                            | 1980+        | 74    | 0      | -    |             |        |          |            |
| Study type                 | Case-control | 213   | 19     | Ref. |             | 0.31   | 0.33     | 0.11- 0.49 |
|                            | Family study | 38    | 7      | 1.57 | 0.66- 3.75  |        | 0.46     | 0.08- 0.69 |
| Relationship with proband  | Other        | 97    | 7      | 1.35 | 0.54- 3.40  | 0.05   | 0.47     | 0.02- 0.71 |
|                            | Sister       | 86    | 13     | Ref. |             |        | 0.37     | 0.06- 0.58 |
|                            | Daughter     | 57    | 5      | 3.71 | 1.28- 10.77 |        | 0.82     | 0.00- 0.98 |
|                            | Mother       | 11    | 1      | 0.29 | 0.04- 2.25  |        | 0.13     | 0.00- 0.33 |
| Proband's age at diagnosis | Less than 40 | 59    | 5      | Ref. |             | 0.62   | 0.32     | 0.00- 0.55 |
|                            | 40-44        | 57    | 6      | 1.16 | 0.35- 3.80  |        | 0.29     | 0.02- 0.48 |
|                            | 45-49        | 70    | 7      | 1.72 | 0.57- 5.14  |        | 0.44     | 0.02- 0.68 |
|                            | 50+          | 65    | 8      | 1.87 | 0.64- 5.42  |        | 0.47     | 0.04- 0.70 |
| <i>BRCA1/2</i> mutations   | None         | 142   | 8      | Ref. |             | 0.0001 | 0.18     | 0.03- 0.31 |
|                            | <i>BRCA1</i> | 80    | 15     | 6.47 | 2.72- 15.41 |        | 0.73     | 0.30- 0.90 |
|                            | <i>BRCA2</i> | 29    | 3      | 2.41 | 0.64- 9.09  |        | 0.39     | 0.00- 0.66 |
| Mutation type              | None         | 142   | 8      | Ref. |             | 0.0003 | 0.19     | 0.03- 0.32 |
|                            | 1991del4     | 7     | 2      | 9.27 | 1.95- 44.00 |        | 0.86     | 0.00- 0.99 |
|                            | 3034del4     | 22    | 1      | 0.97 | 0.12- 7.76  |        | 0.18     | 0.00- 0.46 |
|                            | 3450del4     | 54    | 11     | 6.59 | 2.62- 16.56 |        | 0.75     | 0.26- 0.91 |
|                            | A1708E       | 26    | 4      | 6.13 | 1.82- 20.60 |        | 0.72     | 0.00- 0.94 |

CI, confidence interval; Pval, P-value; Σrisk70y, cumulative risk by age 70 years; Ref., reference.

**Supplementary Figure 1. Multiplex ligation-dependent probe amplification (MLPA) analysis of the *BRCA2* gene.** (A), (B) Upper histograms: x-axis shows the lengths of the fragments (nt); ordinate shows the relative peak area (RPA) of the control result files as blue bars and the RPA of the patient result file as green bars. Lower histograms: x-axis shows the *BRCA2* exon probes and two *BRCA2* flanking probes (FRY, N4BP2L1 (CG018)); ordinate shows the RPA ratios (patient RPA divided by control RPA) as blue bars. (A) MLPA analysis of a normal control. The RPA ratios are in the range of 75-125% indicating the absence of a LGR. (B) MLPA analysis of a breast cancer patient. The RPA ratios are below 75% (0.40-0.59 and 0.41-0.72) indicating the presence of a heterozygous deletion of exons 1-14. Red arrows mark the deleted exons.

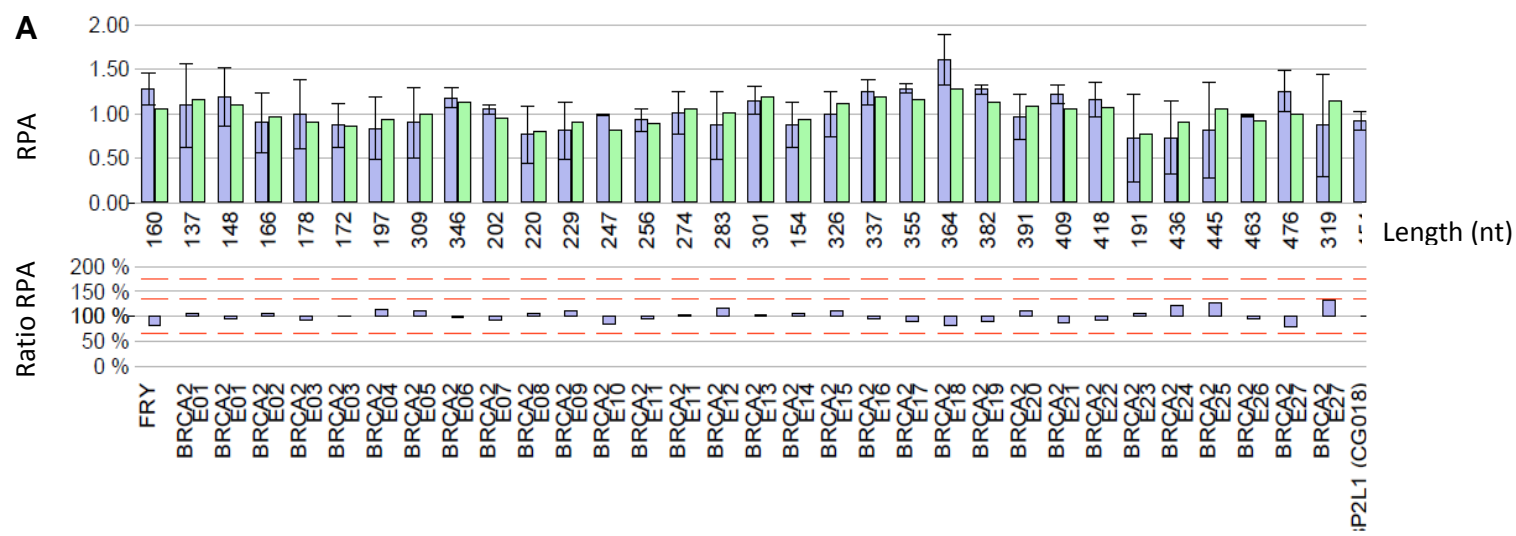

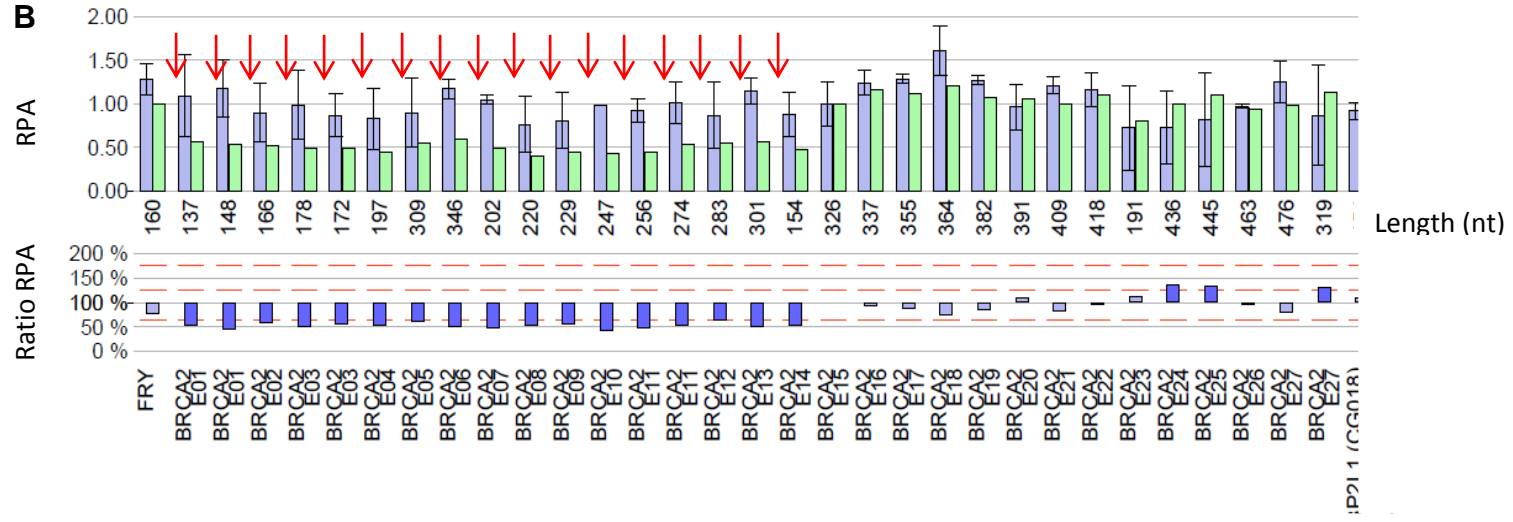

**Supplementary Figure 2. Pedigree deviances revealed four departing pedigrees: two of them in favor of the alternative (with two carriers each diagnosed at ages 32 and 41, or 29 and 38), and two of them in favor of the null hypotheses (with a non-carrier diagnosed at age 39 and with one unaffected carrier at age 60). Exclusion of the four outlying families increased the HR of breast cancer by age 70 years.**

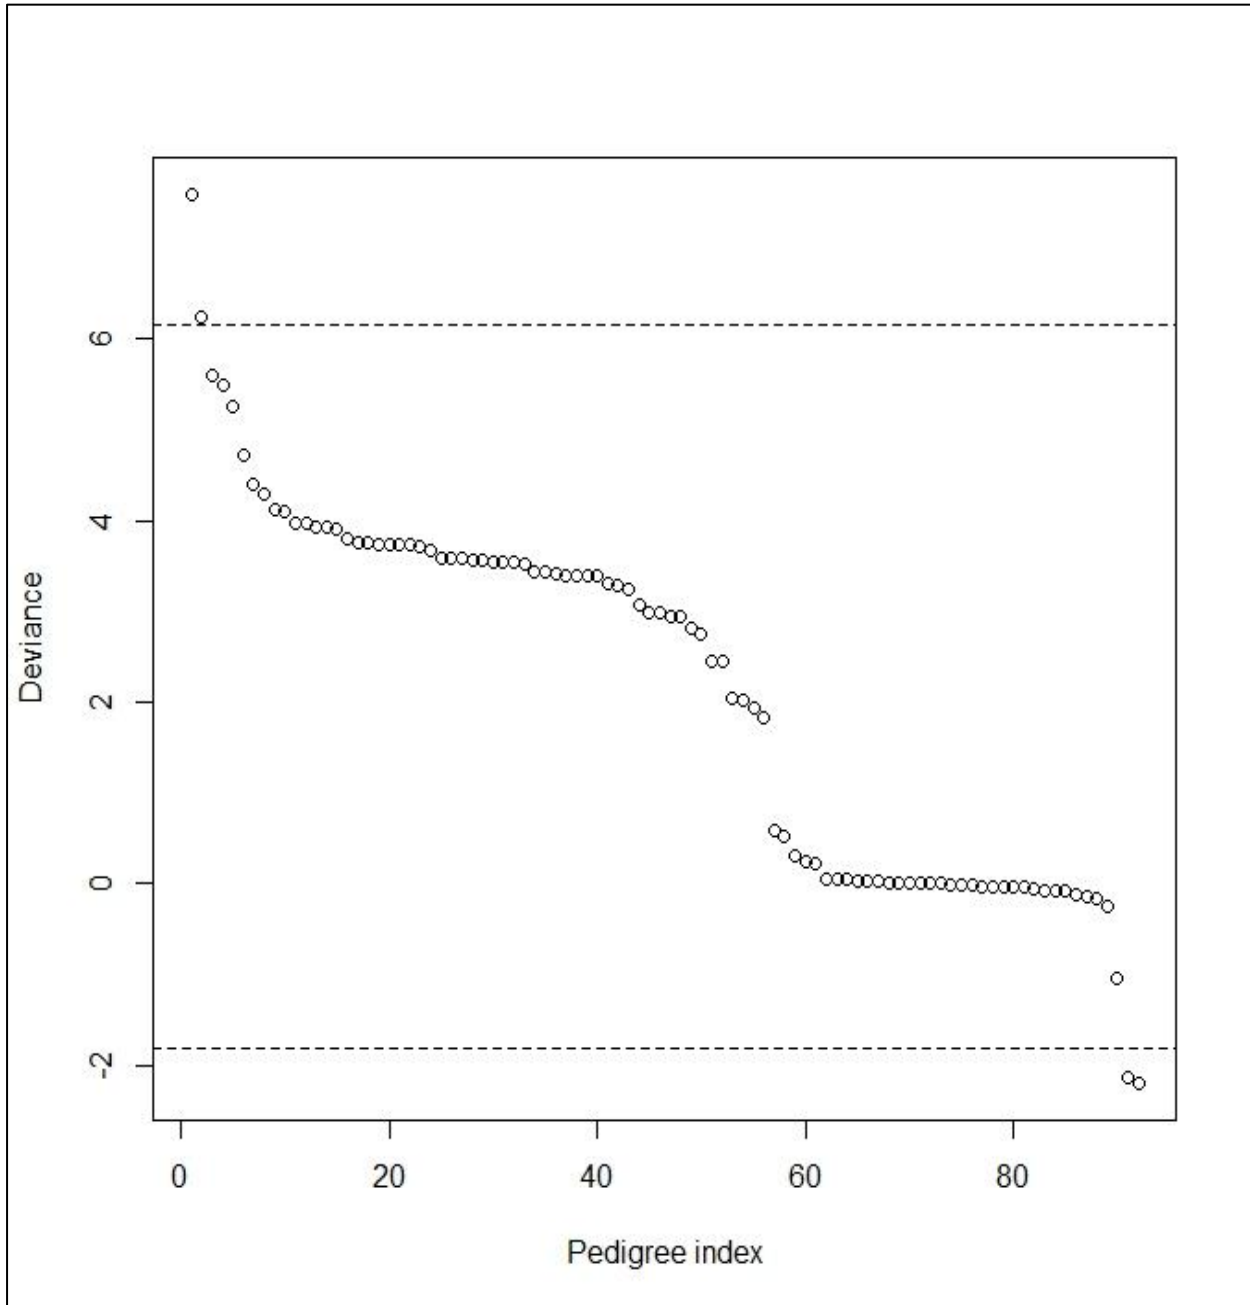

Supplement: 41598_2017_5056_MOESM1_ESM.pdf [file 41598_2017_5056_MOESM1_ESM.pdf]
